# Supplementary material for: Environmental Enrichment Promotes Transgenerational Programming of Uterine Inflammatory and Stress Markers Comparable to Gestational Chronic Variable Stress
Source: MDPI journal article supplement (doi:10.3390/ijms24043734), 2023-02-13
Supplement: s1 [file s1]

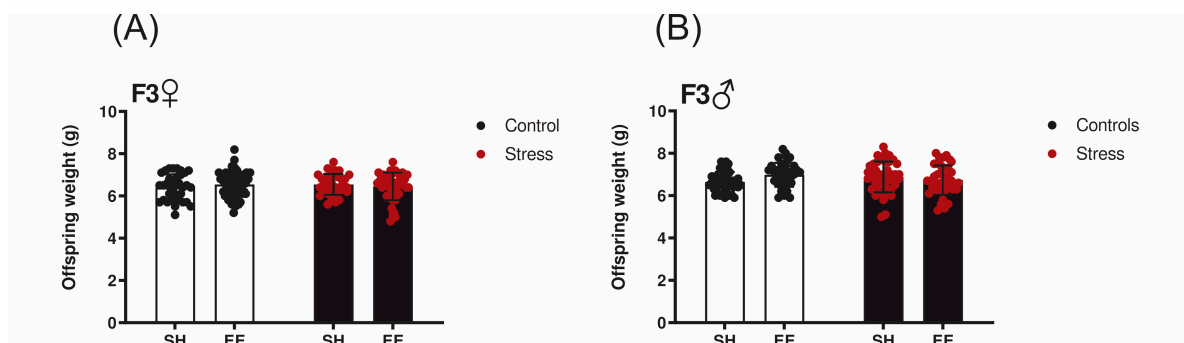

Figure S1: Offspring weights among females (A) and males (B) in the F3 generation.

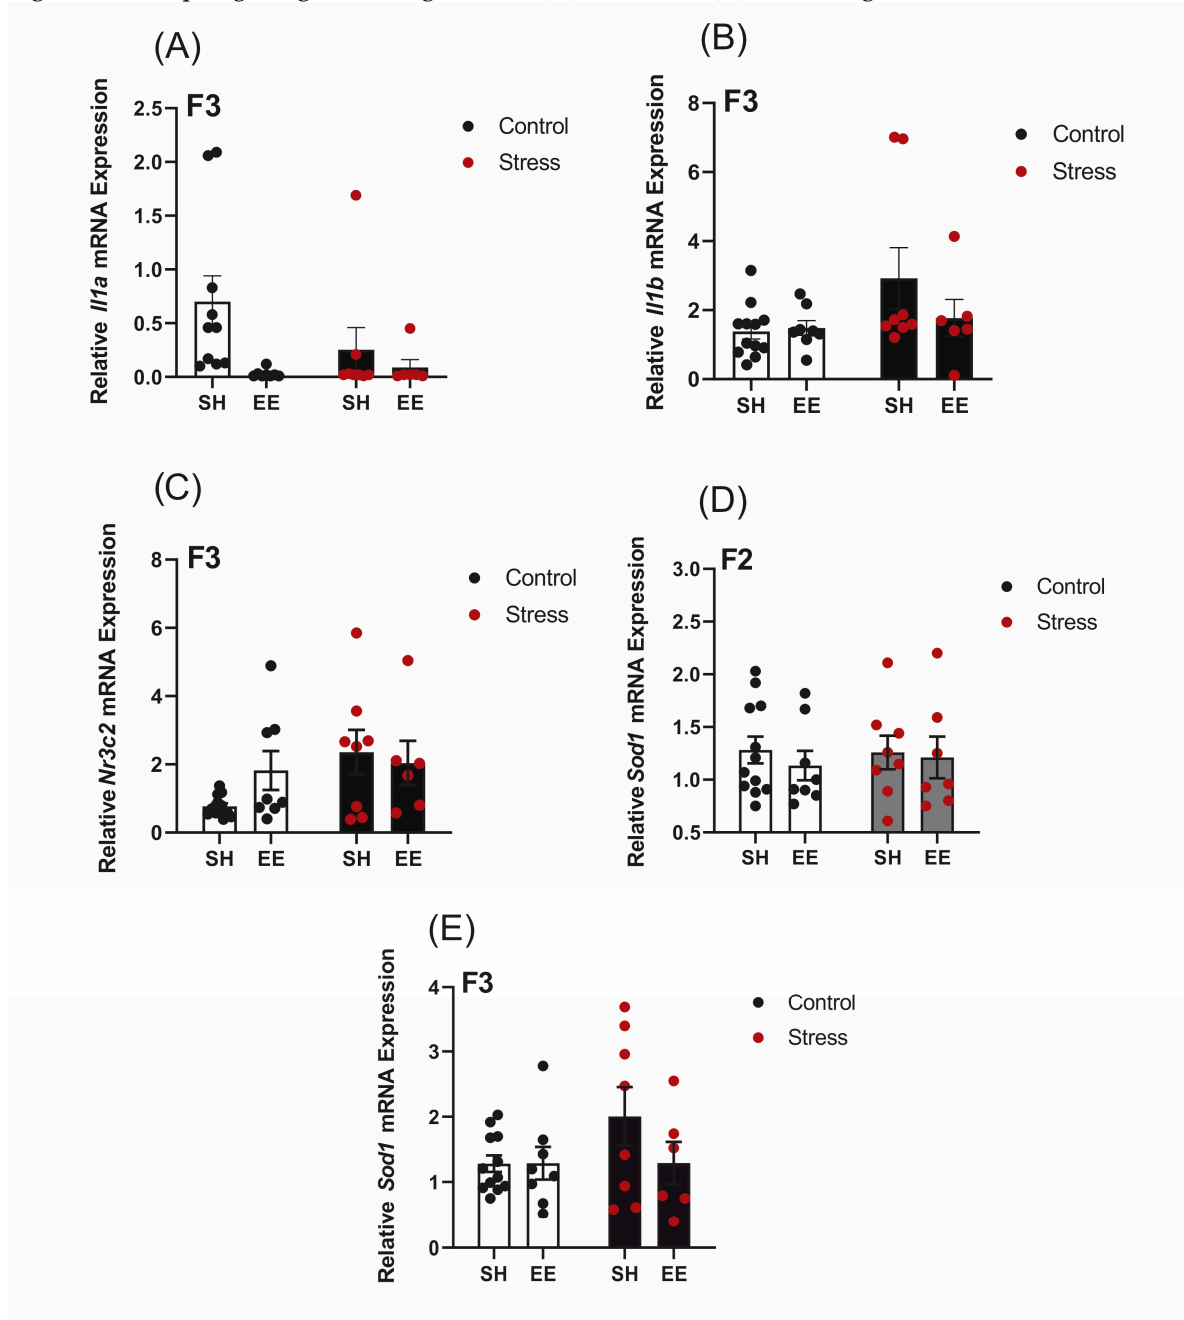

Figure S2: The effects of housing and treatment on inflammatory and stress genes in the F2 (D) and F3 (A–C,E) generations.

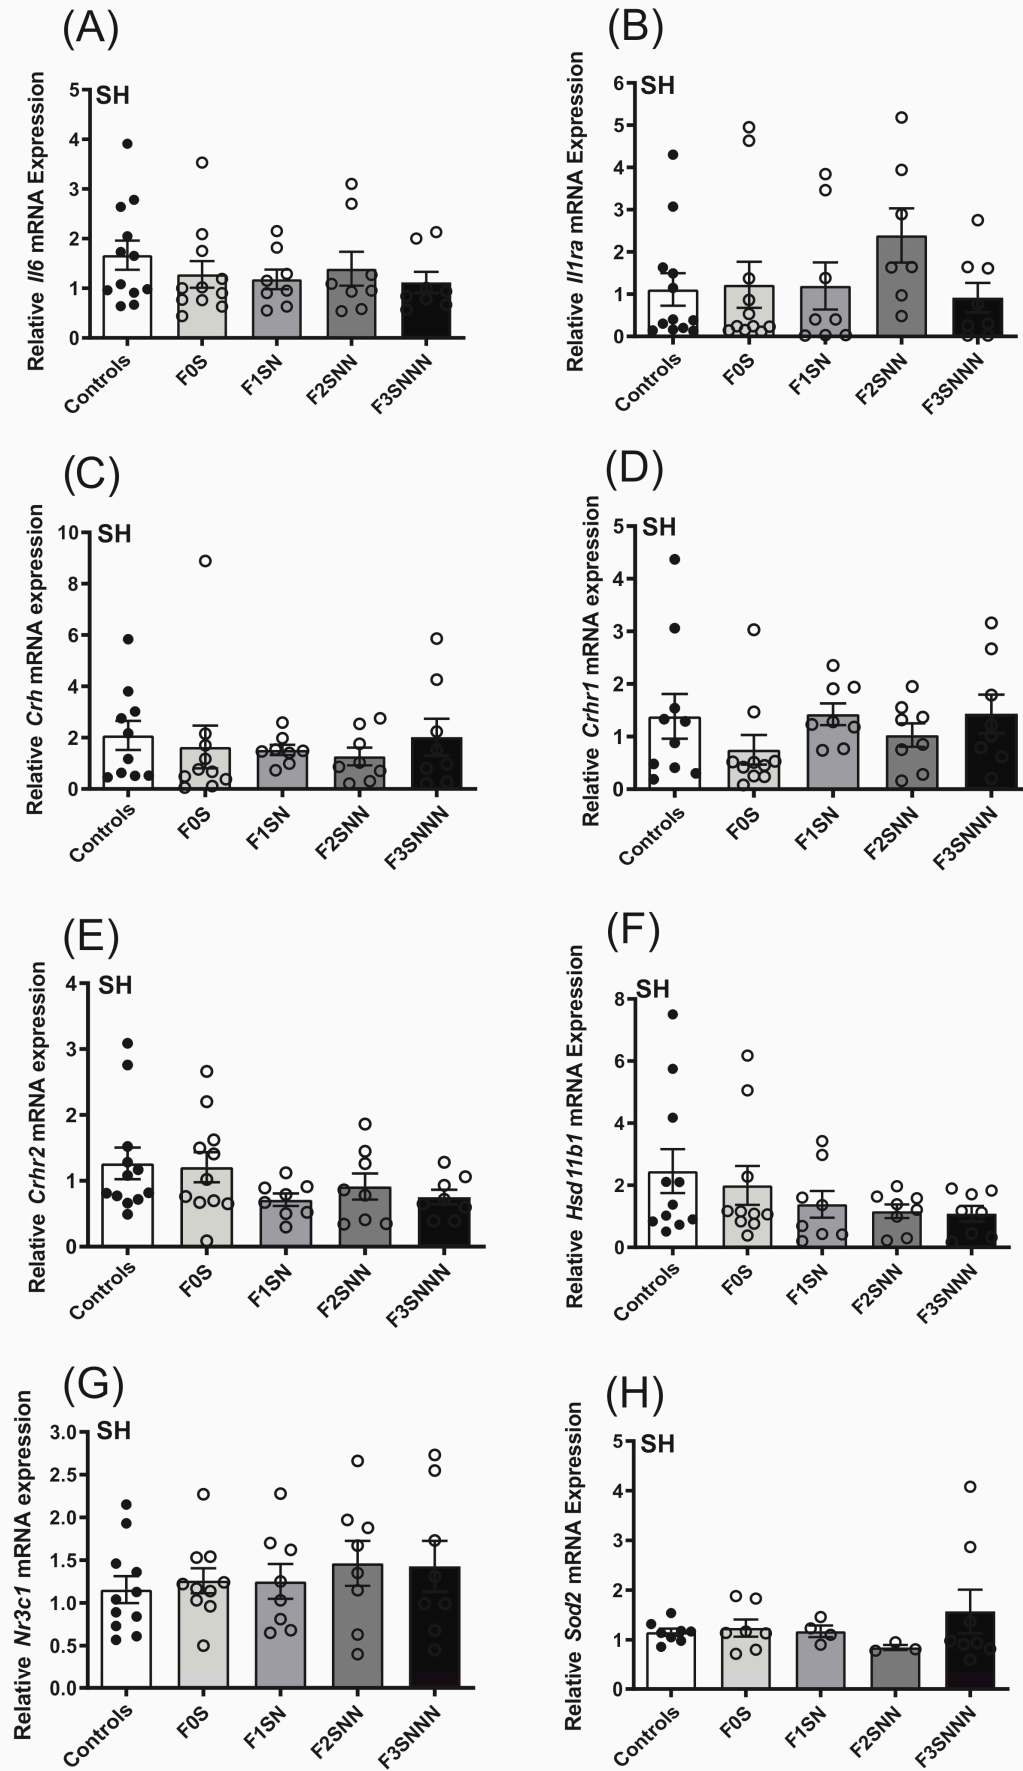

Figure S3: (A–H) CVS effects on inflammatory and stress mediators across generations of rats raised under standard housing.

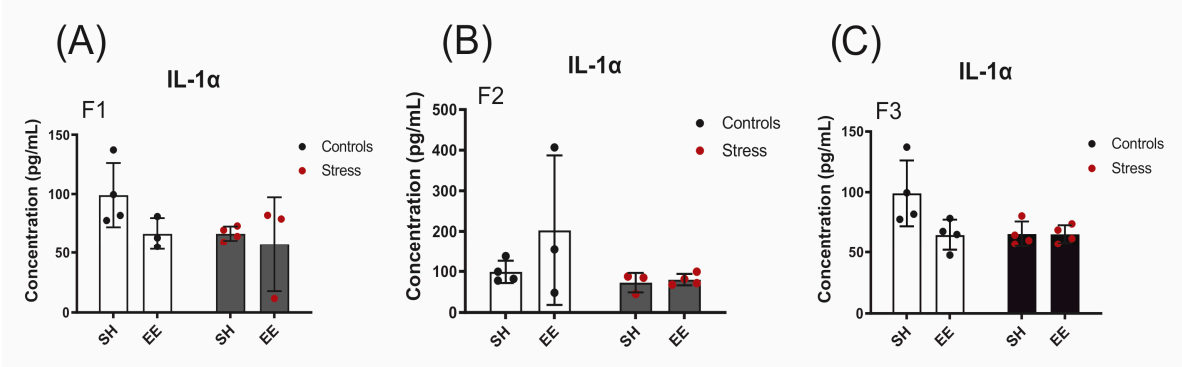

Figure S4: (A–C) The effects of housing and treatment on IL-1α concentrations across the F1-F3 generations of stressed rats.

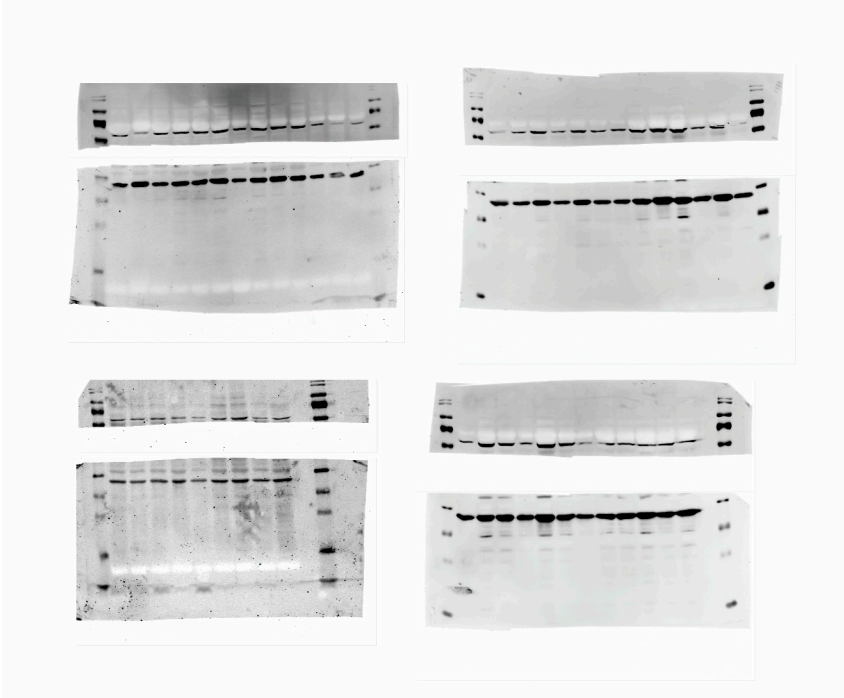

Figure S5: Full blot images of Western Blot analysis.
